# Supplementary material for: Effects of FGFR Tyrosine Kinase Inhibition in OLN-93 Oligodendrocytes
Source: MDPI journal article supplement (doi:10.3390/cells10061318), 2021-05-25
Supplement: s1 [file s1]

**Table S1. List of antibodies used in this study**

| <b>Antigen Name</b>              | <b>Host</b> | <b>Mol. Weight (kDa)</b> | <b>Dilution</b> | <b>Method</b> | <b>Catalogue Nr</b> | <b>Manufacturer</b>                            |
|----------------------------------|-------------|--------------------------|-----------------|---------------|---------------------|------------------------------------------------|
| Anti-Fgfr1                       | Rabbit      | 48-140                   | 1:500           | IF            | SC-57132            | Santa Cruz Biotechnology, Paso Robles, CA, USA |
| Anti-p-Akt                       | Rabbit      | 60                       | 1:500           | WB, IF        | 4060s               | Cell Signalling Technology, Danvers, MA, USA   |
| Anti-p-ERK                       | Rabbit      | 42, 44                   | 1:500           | WB, IF        | 4370s               | Cell Signalling Technology, Danvers, MA, USA   |
| Anti-TrkB                        | Mouse       | 95-145                   | 1:100           | WB, IF        | SC-377218           | Santa Cruz Biotechnology, Paso Robles, CA, USA |
| Anti-pro BDNF                    | Mouse       | 14                       | 1:500           | WB, IF        | SC-65514            | Santa Cruz Biotechnology, Paso Robles, CA, USA |
| Anti-PLP                         | Mouse       | 30                       | 1:1000          | WB, IF        | SC-23570            | Santa Cruz Biotechnology, Paso Robles, CA, USA |
| Anti-CNPase                      | Mouse       | 46                       | 1:500           | WB, IF        | SC-166019           | Santa Cruz Biotechnology, Paso Robles, CA, USA |
| Anti-GAPDH                       | Mouse       | 37                       | 1:2500          | WB            | SC-365062           | Santa Cruz Biotechnology, Paso Robles, CA, USA |
| Goat anti-rabbit                 | Goat        | Secondary Ab             | 1:1000          | WB            | SC-2004             | Santa Cruz Biotechnology, Paso Robles, CA, USA |
| Donkey anti-mouse                | Donkey      | Secondary Ab             | 1:1000          | WB            | SC2096              | Santa Cruz Biotechnology, Paso Robles, CA, USA |
| Donkey anti-goat                 | Donkey      | Secondary Ab             | 1:2500          | WB            | SC2020              | Santa Cruz Biotechnology, Paso Robles, CA, USA |
| Goat anti-rabbit Alexa Fluor 488 | Goat        | Secondary fluorescent Ab | 1:500           | IF            | A-11070             | Invitrogen, Carlsbad, CA, USA                  |
| Goat anti-mouse Alexa Fluor 488  | Goat        | Secondary fluorescent Ab | 1:500           | IF            | A-21121             | Invitrogen, Carlsbad, CA, USA                  |
| Rabbit anti-goat Alexa Fluor 594 | Rabbit      | Secondary fluorescent Ab | 1:500           | IF            | A-11080             | Invitrogen, Carlsbad, CA, USA                  |

**Table S2. List of primers used in this study**

| Gene          | Primer name |         | Primer Sequence (5' → 3')    | Annealing temperature | Manufacturer                                    |
|---------------|-------------|---------|------------------------------|-----------------------|-------------------------------------------------|
| <i>GAPDH</i>  | GAPDH       | forward | AGT GCC AGC CTC GTC TCA TA   | 59.4 °C               | Eurofins Genomics,<br>Ebersberg, BY,<br>Germany |
|               |             | reverse | GGT AAC CAG GCG TCC GAT AC   | 61.4 °C               |                                                 |
| <i>FGFR1</i>  | FGFR1       | forward | CGT GCC TGT GGA AGA ACT TT   | 57.3 °C               |                                                 |
|               |             | reverse | CCG CAT CAT CAT GTA CAG CTC  | 59.8 °C               |                                                 |
| <i>BDNF</i>   | BDNF        | forward | GGA CCA GGA GCG TGA CAA      | 58.2 °C               |                                                 |
|               |             | reverse | TCT CAC CTG GTG GAA CTC AG   | 59.4 °C               |                                                 |
| <i>NTRK2</i>  | TrkB        | forward | CAC ACA CAG GGC TCC TTA      | 56.0 °C               |                                                 |
|               |             | reverse | AGT GGT GGT CTG AGG TTG G    | 58.8 °C               |                                                 |
| <i>PLP1</i>   | PLP         | forward | GTG TTC TCC CAT GGA ATG CT   | 57.3 °C               |                                                 |
|               |             | reverse | TGA AGG TGA GCA GGG AAA CT   | 57.3 °C               |                                                 |
| <i>CNP</i>    | CNPase      | forward | CCA ACA GGA TGT GGT GAG GA   | 59.4 °C               |                                                 |
|               |             | reverse | AGC TGT CTT GGG TGT CAC AA   | 57.3 °C               |                                                 |
| <i>SEAM3A</i> | SEMA3A      | forward | TCT GTA GGT AGC CAC ATT CGAT | 58.4 °C               |                                                 |
|               |             | reverse | TCT GGA AAC TCC TGA GGC AAG  | 59.8 °C               |                                                 |
| <i>TGFβ1</i>  | TGFβ        | forward | CTG CTG ACC CCC ACT GAT AC   | 61.4 °C               |                                                 |
|               |             | reverse | AGC CCT GTA TTC CGT CTC CT   | 59.4 °C               |                                                 |
